# Supplementary material for: Bevacizumab Efficiently Inhibits VEGF-Associated Cellular Processes in Equine Umbilical Vein Endothelial Cells: An In Vitro Characterization
Source: MDPI journal article supplement (doi:10.3390/vetsci10110632), 2023-10-26
Supplement: s1 [file s1]

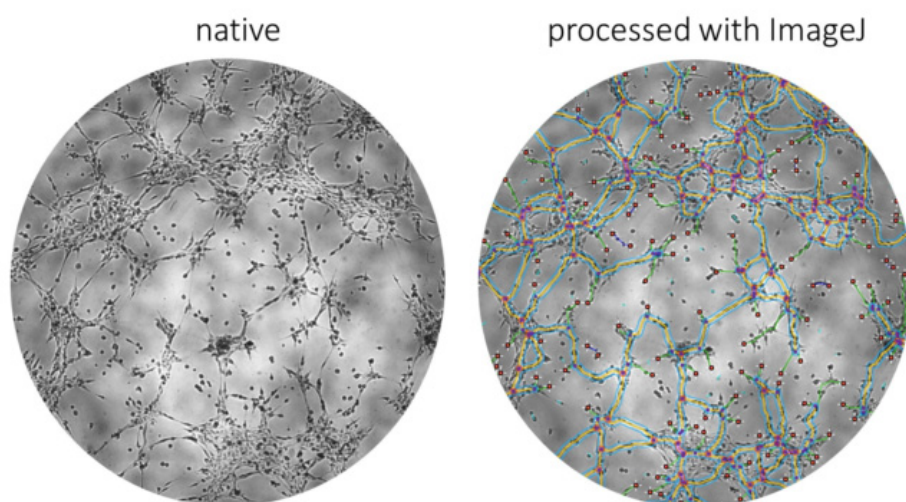

Figure S1: Tube formation assay analysis. Representative images (Ctrl, 10h) processed with ImageJ/Fiji® using the Angiogenesis Analyzer plugin.

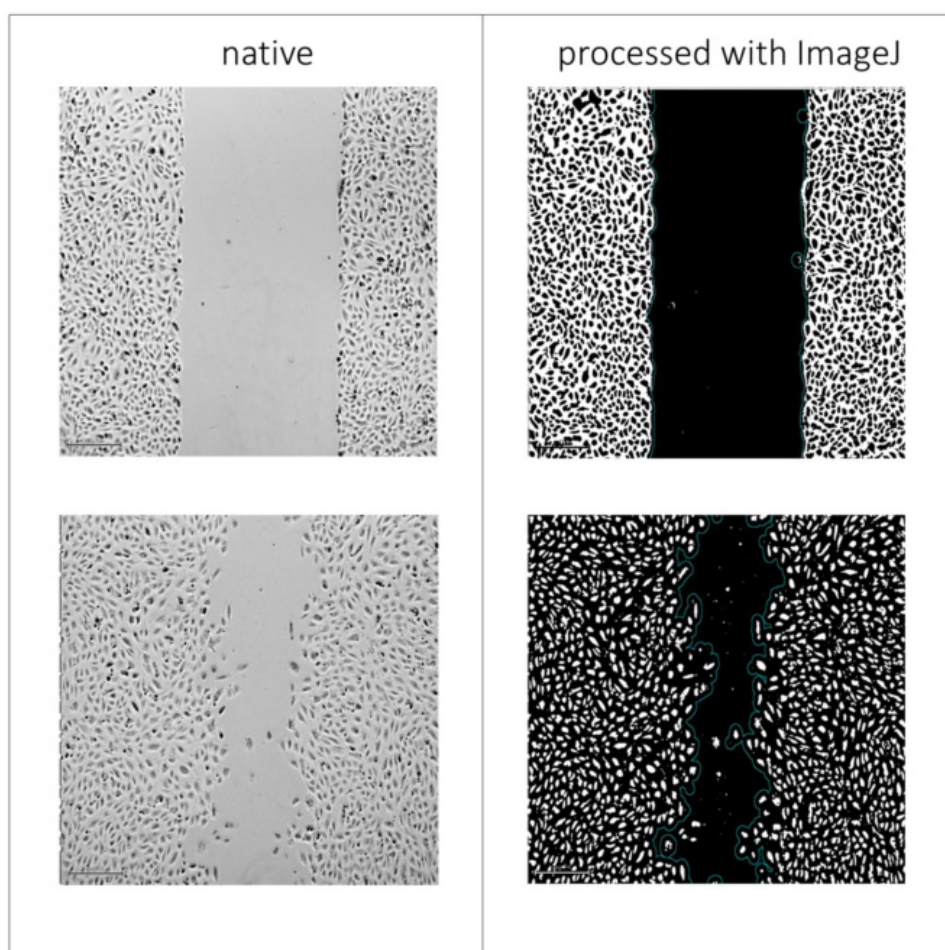

Figure S2: Cell proliferation assay analysis. Representative images (Ctrl, 0h and 24h) processed with ImageJ/Fiji® using the Wound Healing Size Tool plugin.
